# Supplementary material for: Genotype-free demultiplexing of pooled single-cell RNA-seq
Source: PubMed Central journal article supplement (PMC6921391; doi:10.1186/s13059-019-1852-7), 2019-12-19
Supplement: 13059_2019_1852_MOESM1_ESM.pdf [file 13059_2019_1852_MOESM1_ESM.pdf]

| hashtag      | scSplit |   |   |   |   |   |   | vcf |   |   |   |   |   |   |   |   |
|--------------|---------|---|---|---|---|---|---|-----|---|---|---|---|---|---|---|---|
|              | 0       | 1 | 2 | 3 | 4 | 5 | 6 | 7   | D | E | F | A | G | B | H | C |
| 10:106022789 | 0       | 1 | 1 | 0 | 1 | 0 | 1 | 1   | 0 | 0 | 1 | 1 | 1 | 1 | 1 | 0 |
| 11:252649    | 0       | 0 | 1 | 0 | 0 | 0 | 0 | 1   | 0 | 0 | 0 | 0 | 1 | 0 | 1 | 0 |
| 12:7053149   | 1       | 1 | 1 | 0 | 0 | 1 | 1 | 0   | 1 | 1 | 0 | 1 | 1 | 1 | 0 | 0 |
| 19:50168871  | 0       | 1 | 1 | 1 | 1 | 0 | 0 | 1   | 0 | 0 | 1 | 1 | 1 | 0 | 1 | 1 |
| 1:151374025  | 0       | 0 | 1 | 0 | 1 | 1 | 0 | 0   | 0 | 1 | 1 | 0 | 1 | 0 | 0 | 0 |
| 21:30408670  | 0       | 0 | 0 | 1 | 1 | 0 | 1 | 0   | 0 | 0 | 1 | 0 | 0 | 1 | 0 | 1 |
| 3:69153854   | 0       | 0 | 0 | 0 | 0 | 1 | 1 | 1   | 0 | 1 | 0 | 0 | 0 | 1 | 1 | 0 |
| 5:96031569   | 1       | 0 | 1 | 0 | 0 | 0 | 1 | 1   | 1 | 0 | 0 | 0 | 1 | 1 | 1 | 0 |

**Figure S1** Illustration of presence absence matrices calculated on pooled and hashtagged scRNA-seq datasets. Within each rectangle we showed the P/A genotype for each sample calculated on scRNA-seq data using scSplit, and the corresponding P/A genotype calculated from matched genotype files. The mapping of scRNA-seq sample to genotype sample was indicated by colors.

| mix1         | scSplit |   |   |   |   |   |   | imputed vcf |    |    |     |     |     |     |
|--------------|---------|---|---|---|---|---|---|-------------|----|----|-----|-----|-----|-----|
|              | 1       | 2 | 3 | 4 | 5 | 6 | 7 | 11          | 28 | 53 | 110 | 181 | 195 | 326 |
| 10:135233840 | 1       | 0 | 0 | 1 | 0 | 0 | 1 | 0           | 1  | 0  | 0   | 1   | 1   | 0   |
| 13:111293915 | 0       | 0 | 1 | 0 | 0 | 0 | 1 | 0           | 0  | 0  | 0   | 0   | 1   | 1   |
| 16:15131962  | 1       | 1 | 1 | 1 | 1 | 1 | 0 | 1           | 1  | 1  | 1   | 1   | 0   | 1   |
| 17:46103760  | 0       | 0 | 1 | 0 | 1 | 0 | 1 | 0           | 0  | 0  | 1   | 0   | 1   | 1   |
| 1:151374025  | 0       | 1 | 0 | 0 | 1 | 1 | 1 | 1           | 0  | 1  | 1   | 0   | 1   | 0   |
| 4:166264119  | 0       | 0 | 1 | 0 | 1 | 1 | 0 | 1           | 0  | 0  | 1   | 0   | 0   | 1   |
| 4:1694809    | 0       | 1 | 0 | 1 | 0 | 0 | 1 | 0           | 0  | 1  | 0   | 1   | 1   | 0   |

  

| mix2        | scSplit |   |   |   |   |   |   |   | imputed vcf |     |     |     |     |     |     |     |
|-------------|---------|---|---|---|---|---|---|---|-------------|-----|-----|-----|-----|-----|-----|-----|
|             | 1       | 2 | 3 | 4 | 5 | 6 | 7 | 8 | 104         | 114 | 137 | 145 | 161 | 184 | 212 | 259 |
| 11:67353579 | 0       | 0 | 1 | 1 | 0 | 1 | 0 | 1 | 0           | 1   | 0   | 0   | 1   | 1   | 0   | 1   |
| 12:57924050 | 0       | 0 | 0 | 1 | 0 | 0 | 1 | 1 | 0           | 1   | 0   | 1   | 0   | 1   | 0   | 0   |
| 14:51372103 | 1       | 0 | 1 | 0 | 1 | 0 | 0 | 1 | 0           | 1   | 1   | 0   | 0   | 0   | 0   | 1   |
| 14:75408789 | 0       | 1 | 1 | 1 | 0 | 0 | 0 | 0 | 1           | 0   | 0   | 0   | 0   | 1   | 0   | 1   |
| 17:66528778 | 1       | 0 | 0 | 1 | 0 | 0 | 1 | 0 | 0           | 0   | 1   | 1   | 0   | 1   | 0   | 0   |
| 19:6751293  | 0       | 0 | 0 | 0 | 0 | 1 | 1 | 0 | 0           | 0   | 0   | 1   | 1   | 0   | 0   | 0   |
| 2:228222293 | 0       | 0 | 1 | 1 | 1 | 0 | 1 | 0 | 0           | 0   | 0   | 1   | 0   | 1   | 1   | 1   |
| 3:66428282  | 0       | 0 | 0 | 0 | 1 | 1 | 0 | 1 | 0           | 1   | 0   | 0   | 1   | 0   | 1   | 0   |

  

| mix3        | scSplit |   |   |   |   |   |   | imputed vcf |    |    |   |    |     |    |     |     |
|-------------|---------|---|---|---|---|---|---|-------------|----|----|---|----|-----|----|-----|-----|
|             | 0       | 1 | 2 | 3 | 4 | 5 | 6 | 7           | 77 | 78 | 2 | 31 | 169 | 43 | 124 | 320 |
| 14:71051088 | 0       | 0 | 0 | 1 | 0 | 0 | 1 | 0           | 0  | 1  | 0 | 0  | 0   | 0  | 1   | 0   |
| 19:49379167 | 0       | 0 | 1 | 0 | 0 | 0 | 1 | 0           | 0  | 1  | 0 | 0  | 0   | 1  | 0   | 0   |
| 19:51301230 | 0       | 0 | 0 | 0 | 1 | 1 | 1 | 0           | 1  | 1  | 0 | 0  | 1   | 0  | 0   | 0   |
| 1:162753835 | 1       | 0 | 0 | 0 | 0 | 0 | 0 | 0           | 0  | 0  | 0 | 1  | 0   | 0  | 0   | 0   |
| 1:33789382  | 1       | 0 | 0 | 0 | 0 | 0 | 1 | 1           | 0  | 1  | 1 | 1  | 0   | 0  | 0   | 0   |
| 2:99978048  | 0       | 0 | 1 | 0 | 1 | 1 | 0 | 1           | 1  | 1  | 0 | 1  | 0   | 1  | 1   | 0   |
| 4:10076860  | 0       | 1 | 0 | 0 | 0 | 1 | 1 | 1           | 1  | 1  | 1 | 0  | 0   | 0  | 0   | 1   |
| 9:35660901  | 0       | 1 | 0 | 0 | 1 | 0 | 1 | 0           | 0  | 1  | 0 | 0  | 1   | 0  | 0   | 1   |

  

| mix4        | scSplit |   |   |   |   |   |   |   | imputed vcf |     |     |     |     |     |     |    |
|-------------|---------|---|---|---|---|---|---|---|-------------|-----|-----|-----|-----|-----|-----|----|
|             | 0       | 1 | 2 | 3 | 4 | 6 | 7 | 8 | 48          | 179 | 147 | 171 | 205 | 192 | 324 | 76 |
| 15:49776957 | 0       | 1 | 1 | 0 | 1 | 0 | 0 | 0 | 0           | 0   | 1   | 0   | 0   | 1   | 1   | 0  |
| 19:19287928 | 0       | 1 | 0 | 0 | 0 | 1 | 1 | 1 | 1           | 0   | 0   | 1   | 0   | 1   | 0   | 1  |
| 19:35660752 | 1       | 1 | 1 | 1 | 0 | 1 | 0 | 1 | 1           | 1   | 1   | 0   | 1   | 1   | 0   | 1  |
| 1:68170255  | 0       | 0 | 0 | 1 | 1 | 1 | 1 | 0 | 1           | 0   | 0   | 1   | 1   | 0   | 1   | 0  |
| 2:120059921 | 1       | 1 | 0 | 0 | 0 | 1 | 0 | 0 | 1           | 1   | 0   | 0   | 0   | 1   | 0   | 0  |
| 3:52728804  | 0       | 1 | 0 | 1 | 1 | 1 | 0 | 0 | 1           | 0   | 0   | 0   | 1   | 1   | 1   | 0  |
| 7:140706031 | 1       | 0 | 0 | 1 | 0 | 0 | 0 | 0 | 0           | 1   | 0   | 0   | 0   | 1   | 0   | 0  |
| 8:11700101  | 0       | 1 | 1 | 0 | 1 | 0 | 0 | 1 | 0           | 0   | 1   | 0   | 0   | 1   | 1   | 1  |

  

| mix5         | scSplit |   |   |   |   |   |   | imputed vcf |     |     |     |     |   |    |
|--------------|---------|---|---|---|---|---|---|-------------|-----|-----|-----|-----|---|----|
|              | 0       | 1 | 2 | 3 | 4 | 5 | 7 | 88          | 176 | 235 | 193 | 265 | 5 | 39 |
| 10:95104365  | 1       | 0 | 1 | 0 | 0 | 0 | 0 | 1           | 0   | 0   | 0   | 0   | 0 | 1  |
| 12:121675714 | 0       | 1 | 0 | 0 | 1 | 0 | 0 | 0           | 0   | 1   | 1   | 0   | 0 | 0  |
| 13:28241287  | 1       | 1 | 0 | 1 | 0 | 0 | 0 | 0           | 0   | 1   | 0   | 0   | 1 | 1  |
| 2:101622728  | 0       | 0 | 0 | 1 | 1 | 0 | 0 | 0           | 0   | 0   | 1   | 0   | 1 | 0  |
| 5:9548043    | 0       | 0 | 0 | 1 | 0 | 1 | 1 | 0           | 1   | 0   | 0   | 1   | 1 | 0  |
| 7:100958270  | 1       | 1 | 0 | 0 | 0 | 1 | 0 | 0           | 0   | 1   | 0   | 1   | 0 | 1  |
| 7:66121623   | 0       | 0 | 0 | 0 | 1 | 0 | 1 | 0           | 1   | 0   | 0   | 1   | 0 | 0  |

**Figure S2** Illustration of presence absence matrices calculated on pooled fibroblast scRNA-seq datasets. Within each rectangle we show the P/A genotype for each sample calculate on scRNA-seq data using scSplit, and the corresponding P/A genotype calculated from matched genotype files. The mapping of scRNA-seq sample to genotype sample was indicated by colors.
