# Supplementary material for: Genotype-free demultiplexing of pooled single-cell RNA-seq
Source: PubMed Central journal article supplement (PMC6921391; doi:10.1186/s13059-019-1852-7), 2019-12-19
Supplement: 13059_2019_1852_MOESM2_ESM.pdf [file 13059_2019_1852_MOESM2_ESM.pdf]

| <b>Genotyping</b> | Accuracy | NA  |
|-------------------|----------|-----|
| scSplit           | 0.712    | 77% |
| demuxlet          | 0.725    | 79% |

**Table S1** Accuracy of alternative allele Presence/Absence genotypes built from scSplit/demuxlet clusters compared with that from sample genotyping, based on Hashtag scRNA-seq dataset. Accuracy is the proportion of correctly generated genotypes among all non-NA genotypes; NA is the percentage of NA genotypes among all possible elements (shared SNVs x samples)

| <b>Full sieblings</b> | pair 1  | pair 2  | pair 3  |
|-----------------------|---------|---------|---------|
| Mixed samples         | 2       | 2       | 2       |
| Number of cells       | 12,383  | 12,383  | 12,383  |
| Reads per cell        | 4,973   | 4,973   | 4,973   |
| Informative SNVs      | 258,077 | 258,077 | 258,077 |
| Assigning cells       | 1h30m   | 1h30m   | 1h30m   |
| Singlet TPR           | 0.93    | 0.82    | 0.87    |
| Singlet FDR           | 5E-4    | 2E-3    | 9E-4    |
| Doublet TPR           | 0.997   | 0.997   | 1       |
| Doublet FDR           | 3E-3    | 5E-3    | 3E-3    |
| Cohen's Kappa         | 1       | 1       | 1       |

**Table S2** Simulation using full sibling genotypes from UK Biobank shows scSplit can work for very closely related pooled samples
